# Supplementary material for: A super asymmetric cross antenna structure with tunable dual-frequency resonances
Source: Royal Society of Chemistry journal article supplement (doi:10.1039/d3cp03880g), 2023-01-01
Supplement: d3cp03880g1.pdf [file d3cp03880g1.pdf]

## Supporting Information

### Super Asymmetric Cross Antenna Structure with Tunable Dual-Frequency Resonance

*Haiyan Xu<sup>a, b</sup>, and Jianping Wang<sup>a, b\*</sup>*

*<sup>a</sup> Beijing National Laboratory for Molecular Sciences, Molecular Reaction Dynamics Laboratory, CAS Research / Education Center for Excellence in Molecular Sciences, Institute of Chemistry, Chinese Academy of Sciences, Beijing 100190, P. R. China*

*<sup>b</sup> University of Chinese Academy of Sciences, Beijing 100049, P. R. China*

*\* Author to whom correspondences should be addressed.*

*Tel: (+86)-010-62656806; Fax: (+86)-010-62563167; E-mail: jwang@iccas.ac.cn.*

## S1. Parameter Optimization

The tip of nanorod is set as a taper and the sharp angle of taper is called  $\theta$  in the super asymmetric cross antenna structure (SACA). The angle  $\theta$  and the width of nanorod ( $W$ ) are taken into account in order to better understand the influence of the structural parameters of the SACA on the dual-frequency resonance. In order to study the effect of single variable,  $W$  is adjusted by changing the height of taper ( $h$ ) to ensure an unchanged  $\theta$ . Similarly,  $\theta$  is adjusted by changing  $h$  to ensure an unchanged  $W$ . **Figure S1** shows the effect of  $\theta$  and  $W$  on the location of the dual-frequency resonance. In **Figure S1a**, at  $W = 0.18 \mu\text{m}$ , when  $\theta$  increases, the location of the low-frequency mode remains basically unchanged at  $1644 \text{ cm}^{-1}$ , whereas the high-frequency mode is red-shifted from  $3277 \text{ cm}^{-1}$  to  $3166 \text{ cm}^{-1}$ . Throughout the entire range of  $\theta$ , in order to achieve a better electric field enhancement (see Section 3.1.1 for details) and desired frequency range ( $\sim 3300 \text{ cm}^{-1}$ ), the value of  $\theta$  should be set to  $62^\circ$ . As shown in **Figure S1b**, at  $\theta = 62^\circ$ , the locations of two resonances remain roughly unchanged as  $W$  increases. However, by considering the electric field enhancement of the dual-frequency resonance (see Section 3.1.1) and the effect of  $W$  on the actual machining difficulty, the preferred value of  $W$  is  $0.18 \mu\text{m}$ . In summary,  $W$  and  $\theta$  are optimized to be  $0.18 \mu\text{m}$  and  $62^\circ$  respectively.

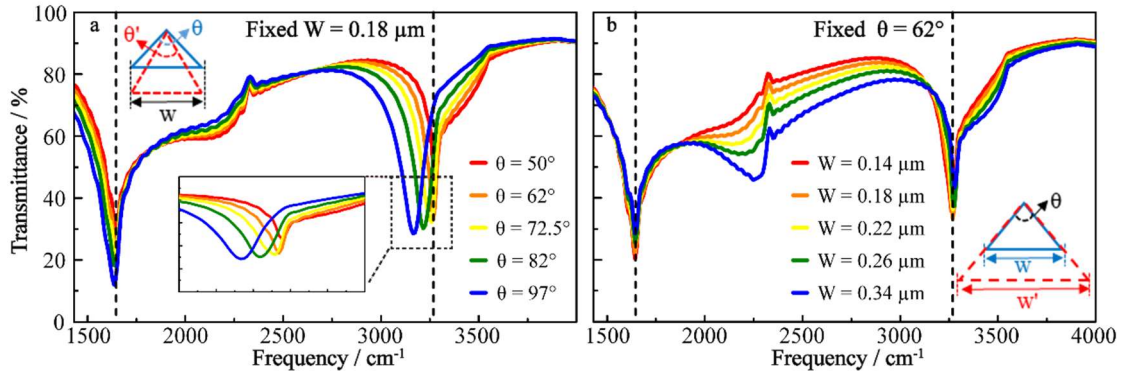

**Figure S1.** The spectral response of the SACA obtained by adjusting the sharp angle of taper ( $\theta$ ) and the width of nanorod ( $W$ ). **(a)** Transmission spectra by regulating  $\theta$  and at fixed  $W$ . Considering the actual machining difficulty, the preferred value of  $W$  is set to  $0.18 \mu\text{m}$ . **(b)** Transmission spectra by regulating  $W$  and at fixed  $\theta$ . Black dashed frame is a drawing of partial enlargement to show the change of the high-frequency mode.

## S2. The Effect of L1-L3 dimer

The transmission spectra of a single  $L_1$ , a single  $L_3$  and an  $L_1$ - $L_3$  dimer are shown in **Figure S2a**, in which the polarized electric field of incident light is along the  $y$ -axis, and the structural parameters of  $L_1$ ,  $L_3$  dimer and  $L_1$ - $L_3$  dimer are the same as those of the super asymmetric cross antenna structure (SACA). It is found that the single-frequency mode of  $L_1$  is located at  $\nu_1 = 1644 \text{ cm}^{-1}$  and that of  $L_3$  is at  $\nu_4 = 3501 \text{ cm}^{-1}$ . A dual-frequency resonance is generated as  $L_1$  and  $L_3$  are approaching and coupled to each other to form an  $L_1$ - $L_3$  dimer, which are located at  $\nu_2 = 1677 \text{ cm}^{-1}$  and  $\nu_3 = 3466 \text{ cm}^{-1}$  respectively. Compared with the case of a single nanorod, the location of the  $L_1$ - $L_3$  dimer is shifted due to the interaction of  $L_1$  and  $L_3$ . The electric field distribution of

the L<sub>1</sub>-L<sub>3</sub> dimer is shown in **Figure S2b** and **S2c**. For the low-frequency mode (1644 cm<sup>-1</sup>), the electric field of the L<sub>1</sub>-L<sub>3</sub> dimer is mainly distributed at the tip of L<sub>1</sub>, and a small amount of that exists at the tip of L<sub>3</sub>. For the high-frequency mode (3466 cm<sup>-1</sup>), the situation is opposite.

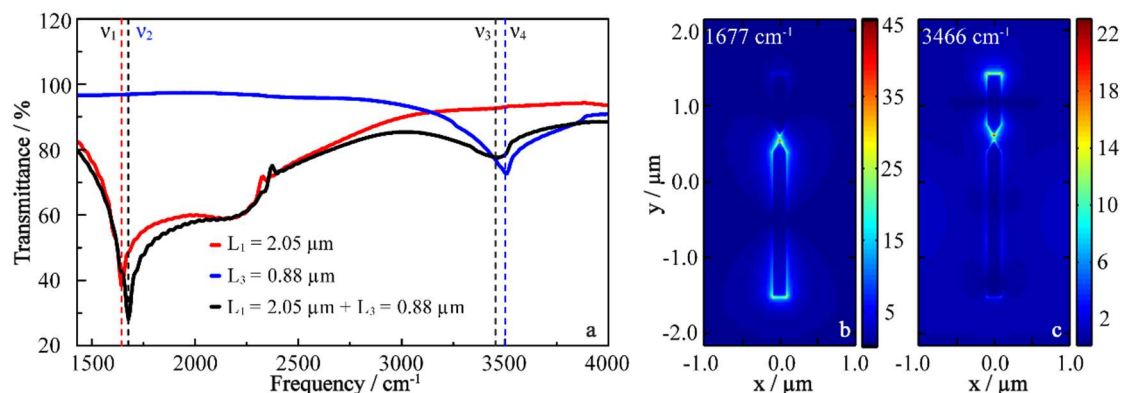

**Figure S2.** Calculated transmission spectra and electric field distribution for three types of nanorods. **(a)** Transmission spectra of a single L<sub>1</sub>, a single L<sub>3</sub> and an L<sub>1</sub>-L<sub>3</sub> dimer with  $\nu_1 = 1644 \text{ cm}^{-1}$ ,  $\nu_2 = 1677 \text{ cm}^{-1}$ ,  $\nu_3 = 3466 \text{ cm}^{-1}$  and  $\nu_4 = 3501 \text{ cm}^{-1}$ . **(b-c)** The electric field distribution of the L<sub>1</sub>-L<sub>3</sub> dimer.

### S3. The effect of L<sub>2</sub>-L<sub>2</sub> dimer

**Figure S3** shows the influence of the orthogonal gap spacing of the L<sub>2</sub>-L<sub>2</sub> dimer ( $g$ ) on the microcavity structure of the SACA. As shown in **Figure S3a**, the location of the low-frequency mode remains unchanged and that of the high-frequency mode is shifted from  $\nu_2 = 3269 \text{ cm}^{-1}$  to  $\nu_3 = 3363 \text{ cm}^{-1}$  as  $g$  increases. As shown in **Figure S3b-e** and also in **Figure 6e-f**, the electric field distribution of the low-frequency mode is mainly concentrated on the tip of L<sub>1</sub> with a weak contribution showing at the edge of the L<sub>2</sub>-L<sub>2</sub> dimer.

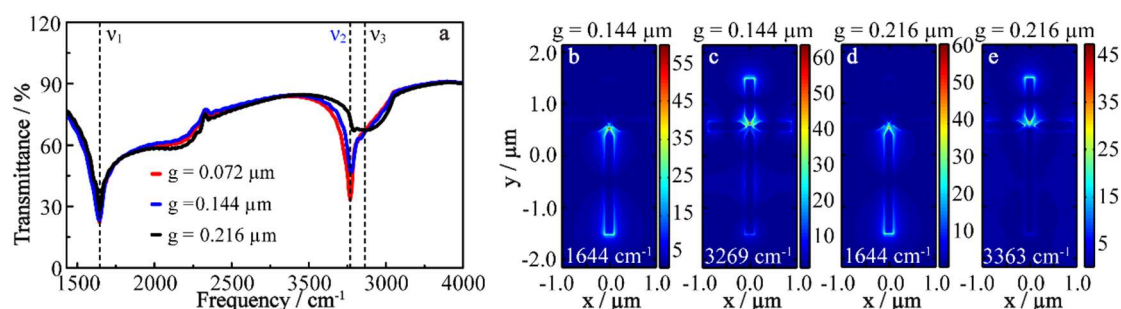

**Figure S3.** The influence of the orthogonal gap spacing of the L<sub>2</sub>-L<sub>2</sub> dimer ( $g$ ) on the microcavity structure of the SACA. **(a)** Transmission spectra of three different structural parameters with  $\nu_1 = 1644 \text{ cm}^{-1}$ ,  $\nu_2 = 3269 \text{ cm}^{-1}$  and  $\nu_3 = 3363 \text{ cm}^{-1}$ . **(b-c)** The electric field distribution of two different structural parameters.
